# **Too disturbed or too hot: summer temperatures more than hikers disturbance affect circadian activity of females in northern chamois**

Thel Lucie<sup>1,2</sup>, Garel Mathieu<sup>3</sup>, Marchand Pascal<sup>4</sup>, Bourgoïn Gilles<sup>5,6</sup>, Loison Anne<sup>1</sup>

## **Authors details**

<sup>1</sup> Laboratoire d'Ecologie Alpine, UMR 5553 (CNRS, Université Savoie Mont--Blanc), Savoie Technolac, 73376 Le Bourget-du-Lac, France.

<sup>2</sup> Laboratoire Évolution et Diversité Biologique, UMR 5174 (CNRS, Université Paul Sabatier), 118 route de Narbonne, 31062 Toulouse, France.

<sup>3</sup> Office Français de la Biodiversité, Direction de la Recherche et de l'Appui Scientifique, Service Anthropisation et Fonctionnement des Ecosystèmes Terrestres, Gières, France.

<sup>4</sup> Office Français de la Biodiversité, Direction de la Recherche et de l'Appui Scientifique, Service Anthropisation et Fonctionnement des Ecosystèmes Terrestres, Juvignac, France.

<sup>5</sup> Univ Lyon, VetAgro Sup, Campus Vétérinaire de Lyon, 1 avenue Bourgelat, F-69280 Marcy l'Etoile, France.

<sup>6</sup> Univ Lyon, Université Lyon 1, CNRS, UMR 5558, Laboratoire de Biométrie et Biologie Evolutive (LBBE), F-69622 Villeurbanne Cedex, France.

**Correspondence author:** Thel Lucie, [lucie.mc.thel@gmail.com](mailto:lucie.mc.thel@gmail.com).

## Abstract

Though non-lethal, recreational activities often result in a spatial and/or temporal shift of activity in a large range of species because they are perceived as a risk. With the concurrent development of outdoors activities and the increase of temperatures due to climate change in mountainous ecosystems, mountain species face an increasing pressure in terms of managing their activity pattern to both limit risk exposure and reduce thermal stress. In this context, we investigated how female northern chamois adjust their summer circadian activity to spatio-temporal variations of both temperature and hikers disturbance. We found that chamois behaviour was more affected by high temperatures than by hikers disturbance. During the hottest days, they shifted their activity peak earlier in the morning (50 minutes earlier; and to a lesser extent, later in the evening), and were more active at night (+ 21.5% *approx.*) than during daytime (- 10.10% *approx.*). Their global daily activity was higher (+ 4.54% *approx.*) during the hottest than coldest days owing to a significant increase of activity level during the activity peaks. Conversely, hikers disturbance had almost no effect on activity peaks of chamois most likely due to a temporal mismatch with hikers arrival and departure. Spatial and temporal disturbance had also a weak effect on chamois activity level, except when considered together and during the hottest days (*i.e.* the most disturbed conditions) exacerbating the temporal report of activity at night those days. Low tolerance of chamois to hikers presence might have led to the pattern reported with a similar response whatever the intensity of encounter risk. These results might also suggest that behavioural changes buffering animals from high temperature (relocation into refuge areas) and/or from hikers presence (moving away temporarily from trails) allow them to marginally modify their activity pattern. In the context of ongoing socio-environmental changes, these findings stress the importance of conserving habitats providing both shelter against summer heat and human disturbance to mitigate their potential detrimental consequences.

**Keywords:** circadian rhythm, ecotourism, human disturbance, mountain ecosystem, nocturnality, recreational activities, *Rupicapra rupicapra rupicapra*

## Introduction

A noticeable development and diversification of outdoor activities has been ongoing in the twenty-first century, especially in Western countries (Wheaton, 2010). While mountain ecosystems have been preserved until recently because of their low accessibility, they now face an increase of unaffiliated activities such as hiking, cross country skiing, trail running, or climbing (Chanteloup, Perrin-Malterre, Duparc, & Loison, 2016). Those recreational activities are non-lethal, but humans can be consistently perceived as predators by wildlife (Byers, 1997; Frid & Dill, 2002), leading to a suite of physiological and behavioural responses (Arlettaz *et al.*, 2007; Marchand *et al.*, 2014; Larson, Reed, Merenlender, & Crooks, 2016). The consequences of repeated reactions to increasing disturbance level can be detrimental on several fitness-related components (Phillips & Alldredge, 2000; French, González-Suárez, Young, Durham, & Gerber, 2011). This could be particularly true in mountain ecosystems, where the diversification of human activities challenges animals all year long, both during the period of energy acquisition (*i.e.* spring to autumn) and loss (*i.e.* winter). This increased pressure on the animals is accompanied by environmental changes, including climate change, that are particularly strong in the Alps (Pepin *et al.*, 2015). Accordingly, temperatures are increasing rapidly in all seasons, with consequences such as earlier springs and plant cycles, more frequent summer heatwaves and droughts, and decreased duration of snow cover (associated with an augmented risk of frost for plants; Gobiet *et al.*, 2014). Mountain animals are therefore facing concomitantly two major changes (increased disturbance level and climate change), with immediate (*e.g.* avoidance of heat and disturbance) and long-term (*e.g.* through food quality or changes in habitat use) consequences

on their behaviour, their physiology and their energetic balance (food intake *vs.* energy expenditure). Indeed, energy loss can be severe and highly detrimental for high-altitude organisms undergoing harsh climatic conditions in winter and benefiting from only short periods with mild weather to store enough energy to survive all year round (Lindstedt & Boyce, 1985).

Ongoing climate change and expansion of human activities in mountain ecosystems are also ultimately connected. An extended summer season or more frequent summer heatwaves in valleys may, for instance, exacerbate human attendance in mountains (Scott, 2006). Although predicting tourism attendance under scenarios of climate change is probably not straightforward (Beniston, 2003; Scott, 2006), this context raises questions on animal responses to those interrelated human-induced environmental changes and on their potential cumulative (even multiplicative) consequences for populations in terms of both immediate and compensatory responses. One critical challenge is to understand whether behavioural mechanisms used by animals to buffer them against increasing temperatures may also provide a benefit against human attendance or *vice versa*.

Wildlife is constantly subject to the foraging/risk avoidance trade-off (Lima & Bednekoff, 1999). Animals navigate and take decisions about where to be and what to do in multiple layers of the landscape described as their “foodscape” (the distribution of edible food resource in a landscape), their landscape of energy (the energy to be spent to move from one place to another in a landscape), their thermal landscape and their landscape of fear (the distribution of the risk perception in space; Laundre, Hernández, & Altendorf, 2001; Searle, Hobbs, & Gordon, 2007). Individuals respond to the different values of these variables in terms of movements, habitat use and selection, and time devoted to different activities (foraging, resting, vigilance or social/sexual interactions). When facing a disturbance perceived as a risk, animals can modify their activities (*e.g.* from foraging to vigilance;

Benoist, Garel, Cugnasse, & Blanchard, 2013; Xu, Gong, & Wang, 2021), and move away temporarily or even definitively (Rogala *et al.*, 2011; Courbin *et al.*, 2022). Another way to face disturbance is to modify their activity pattern by delaying their activities, such as foraging in disturbed places, from high- to low-risk periods (Bonnot *et al.*, 2013). The benefit of such responses to disturbances have been explained within the “risk allocation hypothesis” framework (Lima & Bednekoff, 1999). Indeed, the costs of lost opportunities to forage during risky periods could be dampened if animals transfer part of their diurnal activity to night-time when human activities usually stop (*e.g.* Marchand *et al.*, 2014, Bonnot *et al.*, 2020) or adjust their activity hour by hour (Li *et al.*, 2009) when disturbed.

However, as night can be significantly shorter than day (*e.g.* in summer), the transfer of the diurnal activities to night-time does not necessarily allow to fully compensate for the loss of foraging opportunities during day and may have consequences, for instance, on mass gain (Bourgoin *et al.*, 2011). More generally, activity patterns are precisely regulated (such as the critical foraging/rumination balance in ruminants, Hamel & Côté, 2008), and any modification of those patterns can negatively impact individual’s fitness, *e.g.* by increasing encounter risk with predators (Lesmerises *et al.*, 2018), by leading to mismatches in interactions with conspecifics (Greives *et al.*, 2015), or by increasing risk of diseases infection (Takahashi, Hong, Ko, & McDearmon, 2008). At a coarse time scale, activity patterns are seasonally structured, driven by photoperiod, environmental conditions and species life-cycle (Bourgoin *et al.*, 2008). At a fine pace of time, such as a day, they depend on internal drivers (Saper, Lu, Chou, & Gooley, 2005), fine scale weather conditions (*e.g.* wind speed, Bourgoin *et al.*, 2011) or activity patterns of other species (*e.g.* insect harassment disrupt activity budget in reindeer *Rangifer tarandus tarandus*, Hagemoen & Reimers, 2002). At both coarse and fine time scales, temperature is among the most important regulators of activity patterns (*e.g.* in Alpine ibex *Capra ibex*, Semenzato *et al.*, 2021). Temperature

influences space use (in arctic ground squirrels *Spermophilus parryii*, Long, Martin, & Barnes, 2005; in Mediterranean mouflon *Ovis gmelini musimon x ovis* sp., Marchand *et al.*, 2015) and activity budget (in Japanese monkeys *Macaca fuscata*, Watanuki & Nakayama, 1993), with animals having to trade off foraging and thermal cover to limit thermoregulatory costs while keeping their energy balance (van Beest & Milner, 2013). For example, female Mediterranean mouflons decrease the length of their activity boots, shift their activity peaks (earlier in the morning and later in the evening) and increase their nocturnal activity during the hottest summer days (Bourgoin *et al.*, 2008; Bourgoin *et al.*, 2011). These results highlight the importance of investigating full daily cycles to get a comprehensive picture of how animals may adjust their behaviour in the face of human-induced environmental changes (Marchand *et al.*, 2014; Marchand *et al.*, 2015).

Here, we relied on the GPS monitoring of 62 females of northern chamois *Rupicapra rupicapra rupicapra* to investigate at a fine scale their behavioural responses to temporal and spatial stressors in a dynamic landscape of fear (Palmer *et al.*, 2022). More specifically, we assessed the day-to-day variation in both temperature and hikers attendance for each individual and also computed an individual-specific index of spatial disturbance combining data on the attendance of each trail section by hikers, and the density of hiking trails in each chamois summer home range. This allowed us to investigate individual behavioural responses, using a diversity of activity metrics, to spatio-temporal variations in both temperature and human disturbance, and their relative contributions to changes in summer circadian activity patterns. We expected female chamois to adjust their circadian activity pattern by avoiding being active during the hottest hours during the hottest days (**H1**) and during the most disturbed days (**H2**), with a compensation of lost activity opportunities during daytime at night. However, as individuals were exposed to variable levels of disturbance depending on the location of their summer home range, we also expected more

marked responses in chamois which were the most exposed to hiker disturbance (**H3**) as most of them show low tolerance to hikers presence (Courbin *et al.*, 2022).

## Materials and methods

### *Study site and species*

The study took place in the National Game and Hunting Reserve of Les Bauges massif (NGHRB), in the French Alps (45°40' N, 6°13' E; 900 to 2200 m a.s.l.; 5,200 ha). The Bauges massif is made of limestone, with cold (mean annual temperature: 9.6°C, snow cover from November to April above 1,600 m, Duparc *et al.*, 2013) and wet (mean cumulative annual rainfall: 1,600 mm, Duparc *et al.*, 2013) climatic conditions (see Supporting information 1 for details about summer temperatures). Fifty-six percent of the area is covered by forests, dominated by beech *Fagus sylvatica* and fir *Abies alba*, 36% by grasslands, and 8% by rocks (Lopez, 2001). This heterogeneous environment leads to a huge diversity of habitats and landscapes that attracts numerous tourists every year (> 37,000, most of them during summer). All alpine grasslands are crossed by a network of trails where nearly all hikers are concentrated, so that this network is a major component of the landscape of fear perceived by chamois (Courbin *et al.*, 2022). Other recreational activities (*e.g.* paragliding) occur in the study site during summer, but far less frequently than hiking.

Most adult female chamois annually give birth to one young in late May. During summer, they form groups with other females, kids and yearlings, that share and keep the same home range from year to year (Loison, Jullien, & Menaut, 1999). Females play a major role in the demography of the population (Gaillard, Festa-Bianchet, Yoccoz, Loison, & Toigo, 2000). Chamois had no natural predators in the study area during the study period, except golden eagles *Aquila chrysaetos* and red foxes *Vulpes vulpes* that may occasionally predate newborns and injured animals. However, the presence of some non-resident wolves

*Canis lupus* has been noticed in recent years. Hunting (performed by small groups of three to four hunters) occurs in the NGHRB from the beginning of September to the end of February (Courbin *et al.*, 2022), with chamois being the main target species (~ 100 chamois harvested per year on average, *i.e.* ~ 70% of the total number of ungulates harvested), in addition to Mediterranean mouflon (~ 20%), roe deer *Capreolus capreolus* (~ 4%), wild boar *Sus scrofa* (~ 4%) and red deer *Cervus elaphus* (~ 2%; see Courbin *et al.*, 2022 for details).

### *Data collection*

We focused on summer, *i.e.* between 15<sup>th</sup> June and 7<sup>th</sup> September, 2004-2020, when the hunting season had not started yet so that chamois were exclusively exposed to hikers' disturbance. This period is critical for female chamois because it follows the birth season and it is characterised by high energy requirements for lactation and storage of fat reserves for winter survival (Clutton-Brock, Albon, & Guinness, 1989), so that any disturbance during this period could be particularly detrimental. We used a subset of 62 adult female chamois > 2 years old trapped during summer using falling nets baited with salt licks located in four alpine grasslands near two trails highly used by hikers (Armenaz and Dent des Portes). Those females were equipped with GPS collars Lotek 3300S (Lotek Engineering Inc., Carp, Ontario, Canada). All captures, handling and sampling were conducted according to the appropriate national laws for animal welfare, following the ethical conditions detailed in the specific accreditations delivered by the Préfecture de Paris (prefectorial decree n°2009-014) in agreement with the French environmental code (Art. R421-15 to 421-31 and R422-92 to 422-94-1).

Chamois locations were recorded daily and only chamois with locations during at least 2/3 of the study period (*i.e.* 56 days, because deployment/recovery of GPS collars occurred during summer), for which we could reliably estimate the summer home range (95%



kernel contour using the *adehabitatHR* package; [Worton, 1989](#); [Calenge, 2006](#)) were included in the study. Animal motion was recorded every 5 minutes by two perpendicular captive-balls in the GPS collars monitoring neck movements (0: no movement, 255: highly mobile) and the proportion of time the animal was head down. We discriminated each chamois as “active” or “inactive” for every 5-minutes boot using the discriminant model developed by [Bourgoin and colleagues \(2011](#); see also [Darmon \*et al.\*, 2014](#)). We used a total of 4,543 complete days of activity records from the 62 previously selected chamois ( $n = 137$  chamois-year, 1,308,384 5-minutes activity measurements in total). The activity of each chamois was monitored during 18 to 132 days in total, corresponding to 1 to 49 days (*median* = 36, *SD* = 12) during a single summer period for a given chamois.

We assessed daily characteristics (see below) from 03:00 UTC of day  $d$  to 03:00 UTC of day  $d+1$ . This allowed us to explore potential compensation processes during the night following the day of interest. We selected the starting hour in accordance with the beginning of the chamois activity peak during summer mornings ([Darmon \*et al.\*, 2014](#)). We used ERA5 reanalysis combined with a micro-climatic model ([Kearney & Porter, 2017](#); [Maclean, Mosedale, & Bennie, 2019](#); [Kearney, Gillingham, Bramer, Duffy, & Maclean, 2020](#)) to retrieve the mean daily temperatures within alpine pastures used by chamois during summer months instead of the closest weather station located in the valley. We explored the effect of temperature on female chamois activity pattern through a categorical variable with two levels defined according to the quantiles of the mean daily temperature distribution. Days with mean temperature  $\leq 25\%$  quantile (*i.e.* 10.7°C) were considered as **cold days** and days with mean temperature  $> 75\%$  quantile (*i.e.* 15.5°C) were considered as **hot days**. Cold days experienced by chamois ranged between 3.4°C and 10.7°C (*median* = 8.9°C, *SD* = 1.6°C), while hot days ranged between 15.5°C and 21.0°C (*median* = 17.1°C, *SD* = 1.2°C, see also [Supporting information 1](#)).

Temporal disturbance associated with hiking practice was defined as a categorical variable with two levels. Week-ends and public holidays (*i.e.* vacation days such as Ascension Day) were considered as **highly disturbed days**, whereas days between Monday and Friday (*i.e.* working days, including weekdays during school holidays) were considered as **weakly disturbed days**. To check for the reliability of these two categories in the field, we compared the daily attendance of hikers (number of hikers recorded on the trail) between 03:00 UTC and 23:00 UTC and the hour of first arrival for both temporal disturbance levels using an eco-counter (PYRO sensor Eco-Compteur, [www.eco-compteur.com](http://www.eco-compteur.com); 90 cm above ground) located on Armenaz trail (45°37'18.60" N, 6°13'2.53" E), on a subset of the study period (2016 and 2017 summers). Our study period encompassed 193 theoretically highly disturbed days and 442 weakly disturbed days. Hikers were almost two times more on the trails during highly (*median* = 73 hikers, *SD* = 53 hikers) than during weakly (*median* = 40 hikers, *SD* = 34 hikers) disturbed days (*Mann-Whitney test statistic* = 2,565, *p-value* = 0.005). Hikers also tended to arrive one hour earlier during highly (*median* = 07:00 UTC, *SD* = 2 hours) compared to weakly (*median* = 08:00 UTC, *SD* = 3 hours) disturbed days although this difference was not statistically significant (*Mann-Whitney test statistic* = 1,447, *p-value* = 0.071).

Potential spatial exposure to hikers disturbance was evaluated within each female chamois home range using frequentation rates of the trails extracted from Strava Global Heatmap (Strava, 2022; [www.strava.com](http://www.strava.com), download date: 2022/03/09, data from the two previous years, see also Courbin *et al.*, 2022 for a similar approach on this study site). Strava heatmap provides a value ranging from 0 for no attendance to 255 for the highest attendance for each pixel of the map and is a good proxy of relative human frequentation (Supporting information 2, see also Thorsen *et al.*, 2022). The lowest value recorded for a trail pixel in our study site was 51, so we defined frequentation classes according to the quantiles of the

[51; 255] distribution (*i.e.* covering trail pixels exclusively): 1 = [51; 119] (between 0% and 33% quantile, low frequentation); 2 = ]119; 187] (between 33% and 66% quantiles, intermediate frequentation); 3 = ]187; 255] (between 66% and 100% quantiles, high frequentation). We counted the number of trail pixels of each class in a given home range, and multiplied this number by the corresponding class value (*i.e.* 1, 2 or 3) to give a different weight to each trail pixel according to its frequentation level. We then summed these values for a given home range and normalised the total by dividing it by the home range surface to obtain our spatial disturbance index. We used the median spatial disturbance index (*i.e.* 0.00577) as a threshold to discriminate between **highly exposed chamois** and **weakly exposed chamois**.

As our study period ran over almost three months, day length varied widely and is known to influence chamois activity (Fattorini *et al.*, 2019). We evaluated day length as the time elapsed between dawn and dusk using the *crepuscule* function from the *maptools* package (Bivand & Lewin-Koh, 2022; reference angle of the sun below the horizon = 6°, *i.e.* civil dawn/dusk).

#### *Statistical analyses: predicting activity patterns and calculating activity metrics*

To account for the effect of day length and inter-individual variations on circadian activity patterns (see **Supporting information 3**), we first modelled the daily activity of chamois as a series of values of either 0 (no activity) or 1 (highly active) for each 5-minutes boot. We used a generalised additive mixed model with a binomial distribution of errors (*mgcv* package, Wood, 2011; Wood, Goude, & Shaw 2015; Wood, 2017). We included three fixed effects in the model: 1) *time of the day* (*i.e.* exact time every 5 minutes) and 2) *day length* (and their interaction) as continuous variables with a cyclic cubic regression splines as smoothing basis; 3) a synthesis 8-levels categorical variable representing all possible combinations between

temperature classes, levels of temporal disturbance and of spatial disturbance, in interaction with the *time of the day*. The levels were ordered, with the reference level corresponding to a chamois living in a weakly exposed area during a cold and weakly disturbed day. We defined the unique annual id-year ID of each chamois as a random effect. We set the maximum number of knots for the smoothing functions to 24. We also fitted the null model, which was similar to the model described above but excluded the *temperature-disturbance* variable, for comparison purposes.

We used the predictions of the model to investigate the effect of temperature and hikers disturbance on several activity metrics derived from this model (described below). We controlled for the effect of *day length* by fixing it to the median of the complete dataset (*i.e.* 963 minutes) when predicting chamois activity for each level of the *temperature-disturbance* combination. We derived the *diurnal*, *nocturnal* and *total activity* as the area under the activity curve for each level of the *temperature-disturbance* variable. We defined daytime as the period elapsed between two hours after dawn and two hours before dusk, and night-time as the period elapsed between two hours after dusk and two hours before dawn (see Bonnot *et al.*, 2020 for a similar approach). We assessed the *timing of the morning* and *evening activity peak* (time when the highest activity level occurs in the morning and the evening respectively). We calculated confidence intervals around these values using bootstraps method (Supporting information 4). We then calculated the deviation from the reference level by subtracting the value for the reference level to the value for the level of interest (*i.e.* each level of the *temperature-disturbance* variable) for each activity metric. The percentage of variation between two situations was calculated as  $(value_{end} - value_{start})/value_{start} * 100$ . We performed all analyses using the R software (R Core Development Team 2022).

## Results

### Model adjustment

The full generalised additive mixed model ( $AIC = 1,606,766$ , *explained deviance* = 11.4%, *adjusted R*<sup>2</sup> = 0.149) was better than the null model (including *time of the day* and *day length* effects and excluding the *temperature-disturbance* variable;  $AIC = 1,619,884$ , *explained deviance* = 10.7%, *adjusted R*<sup>2</sup> = 0.140) to predict activity pattern (Fig. 1). All smooth terms (fixed and random effects) were significant ( $p$ -values < 0.001).

### Temperature

Whatever the level of spatial exposure and temporal disturbance, chamois always significantly increased their total activity during hot days compared to cold days of about 0.5 unit (area under curve, see Table 1, see also Fig. 2.a). This change corresponds to a significant increase of *approx.* 0.2 unit (more than 21% variation) in the nocturnal activity and decrease of *approx.* 0.6 unit (more than 10% variation) in the diurnal activity, from cold to hot days (Table 1, Fig. 2.b and 2.c). Chamois also significantly advanced their morning peak, *i.e.* by slightly less than 1h from cold to hot days ( $Timing_{morn. peak cold}$  ranging between 05:40 [05:15; 05:40] UTC and 05:55 [05:30; 05:55] UTC,  $Timing_{morn. peak hot}$  ranging between 04:45 [04:40; 05:10] UTC and 04:55 [04:45; 05:10] UTC), but they only slightly delayed their evening peak (difference not significant for chamois living in a weakly exposed area during weakly disturbed days, Table 2, Fig. 3). Both morning and evening peaks were more intense (*i.e.* higher activity level) of about 14% during hot compared to cold days (Fig. 1). Chamois maintained a certain amount of activity in the middle of the day during cold days

(i.e. slightly above 40%), whereas the activity level at the same hours was lower and more variable during hot days (Fig. 1).

### *Hikers disturbance*

All the summer home ranges used by the studied chamois were crossed by at least one hiking trail, more or less used by hikers. Our spatial disturbance index ranged between 0.00317 and 0.02912 (*median* = 0.00577, *SD* = 0.00433), with only seven chamois above 0.01000 (Supporting information 1). Chamois living in highly exposed areas always had a significantly higher total activity than those living in weakly exposed areas of *approx.* 0.1 unit (almost 1% variation; Table 1, Fig. 2.a), except during cold highly disturbed days where they were similar. However, most exposed chamois significantly decreased their diurnal activity during hot days by *approx.* 0.1 unit (more than 2% variation) as compared to weakly exposed ones and both did not extensively modify their nocturnal activity (Table 1, Fig. 2.b and 2.c). Similarly, chamois did not significantly modify the timing of their activity peaks according to the level of hikers exposure of their summer home range (consider large confidence intervals in Table 2 and Fig. 3).

Chamois significantly increased their total activity level of *approx.* 0.1 unit (1% variation) during highly disturbed days compared to weakly disturbed days, except for chamois living in highly exposed areas during cold days, where it is the opposite (Table 1, Fig. 2.a). In terms of nocturnal/diurnal activity, patterns were less clear regarding the effect of temporal disturbance. Chamois living in highly disturbed areas tended to slightly reduce their diurnal activity during highly disturbed compared to weakly disturbed days by less than 0.1 unit (less than 1% variation). To the contrary, chamois living in weakly disturbed areas increased their diurnal activity by *approx.* 0.1 unit (more than 1% variation). The amount of

nocturnal activity did not change extensively according to temporal disturbance (Fig. 2.b and 2.c). Moreover, the timing of morning and evening activity peaks was not affected by the level of temporal disturbance (consider large confidence intervals in Table 2 and Fig. 3).

## Discussion

### *General results*

Our objective was to determine and compare the relative contribution of summer temperatures and hikers disturbance on the activity pattern of a wild ungulate, the northern chamois. In agreement with **H1**, chamois adjusted their circadian activity to temperature by shifting their activity peak earlier in the morning (and to a lesser extent, later in the evening), and by being more active at night and less active during daytime during hot days. Surprisingly, their total daily activity was higher during hot than cold days owing to a significant increase of activity level during the activity peaks. Furthermore, even if this response was less pronounced, chamois living in areas highly exposed to hikers also adjusted their activity pattern, particularly during hot days, as expected from **H3**. When living in disturbed areas and during disturbed days, they slightly decreased their activity during daytime and increased it during the following night, confirming **H2**. Although they also slightly delayed the morning activity peak during cold days, hikers disturbance had very little effect on timing of activity peaks, most likely due to a temporal mismatch with hiker arrival and departure (*e.g.* more than 2 hours after the morning peak). We also revealed modifications of the activity levels in chamois living in areas weakly exposed to hikers disturbance.

### *Additional effect of potential versus actual exposure to hikers disturbance*

Even during weakly disturbed days (*i.e.* week days), chamois highly exposed to hikers disturbance, due to the presence of highly used trails in their home range, generally demonstrated stronger responses than those living in weakly exposed areas, *i.e.* home ranges where trails were less used and/or less represented. For instance, during hot days, chamois living in highly exposed areas decreased their diurnal activity compared to chamois living in weakly exposed areas, either during highly or weakly disturbed days. During highly disturbed days (*i.e.* week-ends), chamois living in highly disturbed areas decreased their activity even more, demonstrating a cumulative effect of potential exposure to disturbance and actual disturbance itself, directly illustrating the effect of the landscape of fear (Laundre, Hernández, & Altendorf, 2001). But contrary to our expectations, most of the activity metrics explored also varied for chamois living in weakly exposed areas according to the level of temporal disturbance they experienced. Samia and colleagues showed that weakly exposed populations among birds, mammals and lizards can be less tolerant to human disturbance because they are less used to it (Samia, Nakagawa, Nomura, Rangel, & Blumstein, 2015). In our population, most of the individuals (85%) move temporarily away from trails every day when hikers are present (Courbin *et al.*, 2022). This low tolerance might explain the weak difference between most/less disturbed chamois either through a similar response to human presence whatever the encounter risk (human being almost present everyday) or through the relocation of their activity in habitats farther away from the main source of disturbance (*i.e.* trails). Cumulative effects of exposure to human disturbance and actual disturbance are far more important than they seem, particularly because they can induce a delayed response instead of a direct, easily observable one (Chassagneux *et al.*, 2020).



### *Interaction between human disturbance and temperature*

Though chamois seem to be less sensitive to high temperatures than other wild ungulate species (see [Darmon \*et al.\*, 2014](#) for a comparison between chamois and mouflon), their faecal glucocorticoid metabolites concentration increases during drought conditions in summer ([Anderwald, Campell Andri, & Palme 2021](#)), as well as the time they spend in thermal refuges ([Malagnino \*et al.\*, unpublished](#)). This may explain that chamois responded much less strongly to human disturbance than to temperature. Moreover, in our study site, hiker attendance was significantly higher when temperature was high ( $42 \pm 55$  SD hikers during cold days,  $61 \pm 37$  SD hikers during hot days; *Mann-Whitney test statistic* = 322.5, *p-value* = 0.003). Hence, the response to human disturbance could be lower than expected as the behavioural changes to buffer from high temperatures may also prevent chamois from hikers disturbance, as both factors are correlated. Animals have to face several sources of disturbance (*e.g.* human disturbance, predation, high temperatures) and they eventually cannot indefinitely increase their behavioural response as disturbance factors accumulate ([Benoist, Garel, Cugnasse, & Blanchard, 2013](#)).

Recent studies provided evidence of a non-negligeable nocturnal activity peak in chamois ([Carnevali, Lovari, Monaco, & Mori, 2016](#)). Here, we also highlighted that nocturnal activity significantly increased while diurnal activity decreased during hot days, confirming the influence of high temperatures and human disturbance on chamois activity. Similarly to numerous other species, chamois decreased their activity when exposed to high temperatures and/or hikers disturbance and attempted to compensate for the activity loss when it is absent (*e.g.* later in the day or at night, [Gaynor, Hojnowski, Carter, & Brashares, 2018](#)). However, an increase in nocturnal activity could expose individuals to other threats, such as nocturnal predators ([Bonnot \*et al.\*, 2020](#)). This is particularly true in our study site with the progressive return of wolves recorded since the end of the study period. Large

herbivores may face the difficult challenge of avoiding being exposed to high temperature in the middle of the day while limiting their exposure to human disturbance during the rest of the day, but without shifting completely their activity at night because of predation risk.

Chamois can spatially adjust to dampen the impact of hiker disturbance (Duparc, 2016; Courbin *et al.*, 2022). These diel migrations (Courbin *et al.*, 2022) allow chamois to maintain a certain level of activity during disturbed periods. Unfortunately, our data provides no clue about the nature of the behaviours displayed (*i.e.* foraging, resting, moving or social behaviours). But contrary to high temperatures for which any kind of behaviour is costly and should thus be reduced, leading to a lower activity level, some behaviours are favoured in the context of human disturbance and could produce inconsistent activity patterns. For instance, an escape movement is a response to risk which leads to an increase in the activity level, while resting in a refuge area can also be a response to risk (through avoidance) but leads to a lower activity level.

Mountain animals face increasing temperatures through the ongoing climate warming, and modifications of their landscape of fear through the development of recreational activities and the return of predators in these landscapes. Both constraints can lead either to similar responses (*e.g.* rest in refuge areas), or to opposite reactions (*e.g.* reduce activity to avoid thermal stress or escape to limit predation risk), which complicates their behavioural response (Courbin *et al.*, 2022). That is why identifying the effect of human disturbance on wildlife remains a difficult task (Tablado & Jenni, 2017), and an integrated approach is needed to take into account all the covariables affecting chamois activity, such as temperature and predation. Such an approach will be possible in our study site in the forthcoming years (consider Courbin *et al.*, 2022 and Malagnino *et al.*, unpublished together with this study).

#### 444 *Management implications*

445 As ecosystem engineers, wild ungulates play a major role in mountain landscapes, by their  
 446 movements (*e.g.* seed dispersal via zoochory, [Albert \*et al.\*, 2015](#)) and grazing (*e.g.* plant  
 447 selection via grazing, [Austrheim & Eriksson, 2001](#)). Most of the populations of large  
 448 mammals living in the Alps and surrounding massifs have to face several kinds of  
 449 disturbance, ranging from hiking to cable car ebb and flow, while constrained by increasing  
 450 temperature during summer due to climate change ([Brivio \*et al.\*, 2016](#)). As tourism  
 451 development is often a pillar of the local economy, the right balance must be found between  
 452 natural environment and tourism management ([Reynolds & Braithwaite, 2001](#)). Human  
 453 impact on chamois could become an issue given that it may decrease the size of their suitable  
 454 habitats ([Peksa & Ciach, 2015](#)), generate a necessary reorganisation of their circadian activity  
 455 patterns, and reduce their ability to satisfactorily cope with thermal stress, particularly in the  
 456 context of increasing temperatures. The interaction between those factors could eventually  
 457 jeopardise their demography if particular attention is not paid in conserving habitats  
 458 providing both shelter against summer heat and human disturbance ([Frid & Dill, 2002](#);  
 459 [Chirichella, Stephens, Mason, & Apollonio, 2021](#)). Our study contributes to filling the  
 460 knowledge gap on the cumulative effects of weather and human disturbance on chamois  
 461 circadian activity in this context of ongoing socio-environmental changes ([Corlatti \*et al.\*,](#)  
 462 [2022](#)).

## **Authors' contributions**

LT, MG, PM, AL, GB conceived the ideas and designed methodology; MG, PM and AL organised data collection; LT analysed the data; LT led the writing of the manuscript. All authors contributed critically to the drafts and gave final approval for publication.

## **Acknowledgments**

This study was funded by Agence Nationale de la Recherche (French National Research Agency) (ANR) Grant Mov-It No.16-CE02-0010 coordinated by Anne Loison, Centre National de la Recherche Scientifique (Centre National de la Recherche Scientifique) (CNRS). The authors thank all participants for helping with the capture and marking of animals, for the recovery of GPS collars, and for collecting GPS data on human activities: volunteers and professionals from the Office Français de la Biodiversité (formerly Office National de la Chasse et de la Faune Sauvage), the Office National des Forêts, the Groupement d'Intérêt Cynégétique des Bauges, the Parc Naturel Régional du massif des Bauges, the Observatoire Grande Faune et Habitats, and the laboratory Environnements Dynamiques Territoires Montagnes (EDYTEM). This work was performed using the computing facilities of the IFB Cloud.

## **Conflict of Interest**

The authors declared they have no conflict of interest.

## **Data availability statement**

Data will be available after acceptance of the manuscript.

## References

- Albert, A., Auffret, A. G., Cosyns, E., Cousins, S. A. O., D'hondt, B., Eichberg, C., Eycott, A. E., Heinken, T., Hoffmann, M., Jaroszewicz, B., & others. (2015). Seed dispersal by ungulates as an ecological filter: A trait-based meta-analysis. *Oikos*, 124(9), 1109–1120.
- Anderwald, P., Campell Andri, S., & Palme, R. (2021). Reflections of ecological differences? Stress responses of sympatric Alpine chamois and red deer to weather, forage quality, and human disturbance. *Ecology and Evolution*, 11(22), 15740–15753.  
<https://doi.org/10.1002/ece3.8235>
- Arlettaz, R., Patthey, P., Baltic, M., Leu, T., Schaub, M., Palme, R., & Jenni-Eiermann, S. (2007). Spreading free-riding snow sports represent a novel serious threat for wildlife. *Proceedings of the Royal Society B: Biological Sciences*, 274(1614), 1219–1224.
- Austrheim, G., & Eriksson, O. (2001). Plant species diversity and grazing in the Scandinavian mountains-patterns and processes at different spatial scales. *Ecography*, 24(6), 683–695.
- Beniston, M. (2003). Climatic change in mountain regions: a review of possible impacts. *Climate Variability and Change in High Elevation Regions: Past, Present & Future*, 5–31.
- Benoist, S., Garel, M., Cugnasse, J.-M., & Blanchard, P. (2013). Human disturbances, habitat characteristics and social environment generate sex-specific responses in vigilance of Mediterranean mouflon. *PLoS One*, 8(12), e82960.
- Bivand, R., & Lewin-Koh, N. (2022). *maptools: Tools for Handling Spatial Objects*.  
<https://cran.r-project.org/package=maptools>
- Bonnot, N. C., Couriot, O., Berger, A., Cagnacci, F., Ciuti, S., De Groeve, J. E., Gehr, B., Heurich, M., Kjellander, P., Kröschel, M., & others. (2020). Fear of the dark?

Contrasting impacts of humans versus lynx on diel activity of roe deer across Europe.  
Journal of Animal Ecology, 89(1), 132–145. <https://doi.org/10.1111/1365-2656.13161>

Bonnot, N., Morellet, N., Verheyden, H., Cargnelutti, B., Lourtet, B., Klein, F., & Hewison, A. J. (2013). Habitat use under predation risk: hunting, roads and human dwellings influence the spatial behaviour of roe deer. *European Journal of Wildlife Research*, 59(2), 185–193.

Bourgoin, G, Garel, M., Van Moorter, B., Dubray, D., Maillard, D., Marty, E., & Gaillard, J.-M. (2008). Determinants of seasonal variation in activity patterns of mouflon. *Canadian Journal of Zoology*, 86(12), 1410–1418.

Bourgoin, G., Garel, M., Blanchard, P., Dubray, D., Maillard, D., & Gaillard, J.-M. (2011). Daily responses of mouflon (*Ovis gmelini musimon* x *Ovis* sp.) activity to summer climatic conditions. *Canadian Journal of Zoology*, 89(9), 765–773. <https://doi.org/10.1139/Z11-046>

Brivio, F., Bertolucci, C., Tettamanti, F., Filli, F., Apollonio, M., & Grignolio, S. (2016). The weather dictates the rhythms: Alpine chamois activity is well adapted to ecological conditions. *Behavioral Ecology and Sociobiology*, 70(8), 1291–1304.

Byers, J. A. (1997). *American pronghorn: social adaptations and the ghosts of predators past*. University of Chicago Press.

Calenge, C. (2006). The package adehabitat for the R software: tool for the analysis of space and habitat use by animals. *Ecological Modelling*, 197, 1035.

Carnevali, L., Lovari, S., Monaco, A., & Mori, E. (2016). Nocturnal activity of a diurnal species, the northern chamois, in a predator-free Alpine area. *Behavioural Processes*, 126, 101–107.

Chanteloup, L., Perrin-Malterre, C., Duparc, A., & Loison, A. (2016). Quels points de vue sur les espaces partagés entre humains et animaux sauvages? *Espaces et Sociétés*, 1, 33–47.

- Chassagneux, A., Calenge, C., Marchand, P., Richard, E., Guillaumat, E., Baubet, E., & Saïd, S. (2020). Should I stay or should I go? Determinants of immediate and delayed movement responses of female red deer (*Cervus elaphus*) to drive hunts. *Plos One*, 15(3), e0228865.
- Chirichella, R., Stephens, P. A., Mason, T. H. E., & Apollonio, M. (2021). Contrasting effects of climate change on Alpine chamois. *The Journal of Wildlife Management*, 85(1), 109–120.
- Clutton-Brock, T. H., Albon, S. D., & Guinness, F. E. (1989). Fitness costs of gestation and lactation in wild mammals. *Nature*, 337(6204), 260–262.  
<https://doi.org/10.1038/337260a0>
- Corlatti, L., Iacolina, L., Safner, T., Apollonio, M., Buzan, E., Ferretti, F., Hammer, S. E., Herrero, J., Rossi, L., Serrano, E., & others. (2022). Past, present and future of chamois science. *Wildlife Biology*, e01025. <https://doi.org/10.1002/wlb3.01025>
- Courbin, N., Garel, M., Marchand, P., Duparc, A., Debeffe, L., Börger, L., & Loison, A. (2022). Interacting lethal and nonlethal human activities shape complex risk tolerance behaviors in a mountain herbivore. *Ecological Applications*, e2640.  
<https://doi.org/10.1002/eap.2640>
- Darmon, G., Bourgoïn, G., Marchand, P., Garel, M., Dubray, D., Jullien, J.-M., & Loison, A. (2014). Do ecologically close species shift their daily activities when in sympatry? A test on chamois in the presence of mouflon. *Biological Journal of the Linnean Society*, 111(3), 621–626. <https://doi.org/10.1111/bij.12228>
- Duparc, A. (2016). Dynamiques spatio-temporelles des ressources alimentaires et des activités humaines: impacts sur la sélection d’habitat d’un grand herbivore de montagne. Université Grenoble Alpes.

- 560 Duparc, A., Redjadj, C., Viard-Cr  tat, F., Lavorel, S., Austrheim, G., & Loison, A. (2013).  
561 Co-variation between plant above-ground biomass and phenology in sub-alpine  
562 grasslands. *Applied Vegetation Science*, 16(2), 305–316.
- 563 Fattorini, N., Brunetti, C., Baruzzi, C., Chiatante, G., Lovari, S., & Ferretti, F. (2019).  
564 Temporal variation in foraging activity and grouping patterns in a mountain-dwelling  
565 herbivore: Environmental and endogenous drivers. *Behavioural Processes*, 167,  
566 103909.
- 567 French, S. S., Gonz  lez-Su  rez, M., Young, J. K., Durham, S., & Gerber, L. R. (2011).  
568 Human disturbance influences reproductive success and growth rate in California sea  
569 lions (*Zalophus californianus*). *PloS One*, 6(3), e17686.  
570 <https://doi.org/10.1371/journal.pone.0017686>
- 571 Frid, A., & Dill, L. (2002). Human-caused disturbance stimuli as a form of predation risk.  
572 *Conservation Ecology*, 6(1). <https://doi.org/10.5751/es-00404-060111>
- 573 Gaillard, J.-M., Festa-Bianchet, M., Yoccoz, N. G., Loison, A., & Toigo, C. (2000).  
574 Temporal variation in fitness components and population dynamics of large herbivores.  
575 *Annual Review of Ecology and Systematics*, 31(1), 367–393.  
576 <https://doi.org/10.1146/annurev.ecolsys.31.1.367>
- 577 Gaynor, K. M., Hojnowski, C. E., Carter, N. H., & Brashares, J. S. (2018). The influence of  
578 human disturbance on wildlife nocturnality. *Science*, 360(6394), 1232–1235.  
579 <https://doi.org/10.1126/science.aar7121>
- 580 Gobiet, A., Kotlarski, S., Beniston, M., Heinrich, G., Rajczak, J., & Stoffel, M. (2014). 21st  
581 century climate change in the European Alps - A review. *Science of the Total*  
582 *Environment*, 493, 1138–1151.
- 583 Greives, T. J., Kingma, S. A., Kranstauber, B., Mortega, K., Wikelski, M., van Oers, K.,  
584 Mateman, A. C., Ferguson, G. A., Beltrami, G., & Hau, M. (2015). Costs of sleeping in:



circadian rhythms influence cuckoldry risk in a songbird. *Functional Ecology*, 29(10), 1300–1307.

Hagemoen, R. I. M., & Reimers, E. (2002). Reindeer summer activity pattern in relation to weather and insect harassment. *Journal of Animal Ecology*, 71(5), 883–892.

Hamel, S., & Côté, S. D. (2008). Trade-offs in activity budget in an alpine ungulate: contrasting lactating and nonlactating females. *Animal Behaviour*, 75(1), 217–227.

Kearney, M. R., Gillingham, P. K., Bramer, I., Duffy, J. P., & Maclean, I. M. D. (2020). A method for computing hourly, historical, terrain-corrected microclimate anywhere on Earth. *Methods in Ecology and Evolution*, 11(1), 38–43.

Kearney, M. R., & Porter, W. P. (2017). NicheMapR - an R package for biophysical modelling: the microclimate model. *Ecography*, 40(5), 664–674.

Larson, C. L., Reed, S. E., Merenlender, A. M., & Crooks, K. R. (2016). Effects of recreation on animals revealed as widespread through a global systematic review. *PloS One*, 11(12), e0167259.

Laundré, J. W., Hernández, L., & Altendorf, K. B. (2001). Wolves, elk, and bison: reestablishing the "landscape of fear" in Yellowstone National Park, USA. *Canadian Journal of Zoology*, 79(8), 1401–1409.

Lesmerises, F., Déry, F., Johnson, C. J., & St-Laurent, M.-H. (2018). Spatiotemporal response of mountain caribou to the intensity of backcountry skiing. *Biological Conservation*, 217, 149–156.

Li, C., Jiang, Z., Feng, Z., Yang, X., Yang, J., & Chen, L. (2009). Effects of highway traffic on diurnal activity of the critically endangered Przewalski gazelle. *Wildlife Research*, 36(5), 379–385.

- Lima, S. L., & Bednekoff, P. A. (1999). Temporal variation in danger drives antipredator behavior: the predation risk allocation hypothesis. *The American Naturalist*, 153(6), 649–659.
- Lindstedt, S. L., & Boyce, M. S. (1985). Seasonality, fasting endurance, and body size in mammals. *The American Naturalist*, 125(6), 873–878. <https://doi.org/10.1086/284385>
- Loison, A., Jullien, J.-M., & Menaut, P. (1999). Subpopulation structure and dispersal in two populations of chamois. *Journal of Mammalogy*, 80(2), 620–632.
- Long, R. A., Martin, T. J., & Barnes, B. M. (2005). Body temperature and activity patterns in free-living arctic ground squirrels. *Journal of Mammalogy*, 86(2), 314–322.
- Lopez, J. F. (2001). Inventaire systématique de la flore et de la végétation du Massif des Bauges.
- Maclean, I. M. D., Mosedale, J. R., & Bennie, J. J. (2019). Microclima: An r package for modelling meso-and microclimate. *Methods in Ecology and Evolution*, 10(2), 280–290.
- Marchand, P., Garel, M., Bourgoïn, G., Dubray, D., Maillard, D., & Loison, A. (2014). Impacts of tourism and hunting on a large herbivores spatio-temporal behavior in and around a French protected area. *Biological Conservation*, 177, 1–11.
- Marchand, P., Garel, M., Bourgoïn, G., Dubray, D., Maillard, D., & Loison, A. (2015). Sex-specific adjustments in habitat selection contribute to buffer mouflon against summer conditions. *Behavioral Ecology*, 26(2), 472–482.
- Pęksa, Ł., & Ciach, M. (2015). Negative effects of mass tourism on high mountain fauna: the case of the Tatra chamois *Rupicapra rupicapra tatrica*. *Oryx*, 49(3), 500–505.
- Palmer M. S., Gaynor K. M., Becker J. A., Abraham J. O., Mumma M. A., & Pringle R. M. (2022). Dynamic landscapes of fear: understanding spatiotemporal risk. *Trends in Ecology & Evolution*. <https://doi.org/10.1016/j.tree.2022.06.007>

632 Pepin, N., Bradley, R. S., Diaz, H. F., Baraër, M., Caceres, E. B., Forsythe, N., Fowler, H.,  
633 Greenwood, G., Hashmi, M. Z., Liu, X. D., & others. (2015). Elevation-dependent  
634 warming in mountain regions of the world. *Nature Climate Change*, 5(5), 424–430.

635 Phillips, G. E., & Alldredge, A. W. (2000). Reproductive success of elk following  
636 disturbance by humans during calving season. *The Journal of Wildlife Management*,  
637 521–530.

638 Reynolds, P. C., & Braithwaite, D. (2001). Towards a conceptual framework for wildlife  
639 tourism. *Tourism Management*, 22(1), 31–42.

640 Rogala, J. K., Hebblewhite, M., Whittington, J., White, C. A., Coleshill, J., & Musiani, M.  
641 (2011). Human activity differentially redistributes large mammals in the Canadian  
642 Rockies National Parks. *Ecology and Society*, 16(3).

643 Samia, D. S. M., Nakagawa, S., Nomura, F., Rangel, T. F., & Blumstein, D. T. (2015).  
644 Increased tolerance to humans among disturbed wildlife. *Nature Communications*, 6(1),  
645 1–8.

646 Saper, C. B., Lu, J., Chou, T. C., & Gooley, J. (2005). The hypothalamic integrator for  
647 circadian rhythms. *Trends in Neurosciences*, 28(3), 152–157.

648 Scott, D. (2006). Global environmental change and mountain tourism. *Tourism and Global*  
649 *Environmental Change*, 54–75.

650 Searle, K. R., Hobbs, N. T., & Gordon, I. J. (2007). It's the "foodscape", not the landscape:  
651 using foraging behavior to make functional assessments of landscape condition. *Israel*  
652 *Journal of Ecology and Evolution*, 53(3–4), 297–316.

653 Semenzato, P., Cagnacci, F., Ossi, F., Eccel, E., Morellet, N., Hewison, A. J. M., Sturaro, E.,  
654 & Ramanzin, M. (2021). Behavioural heat-stress compensation in a cold-adapted  
655 ungulate: Forage-mediated responses to warming Alpine summers. *Ecology Letters*,  
656 24(8), 1556–1568.

657 Strava. 2022. Strava Global Heatmap. <https://www.strava.com/heatmap>.

658 Tablado, Z., & Jenni, L. (2017). Determinants of uncertainty in wildlife responses to human  
659 disturbance. *Biological Reviews*, 92(1), 216–233.

660 Takahashi, J. S., Hong, H.-K., Ko, C. H., & McDearmon, E. L. (2008). The genetics of  
661 mammalian circadian order and disorder: implications for physiology and disease.  
662 *Nature Reviews Genetics*, 9(10), 764–775.

663 Thorsen, N. H., Bischof, R., Mattisson, J., Hofmeester, T. R., Linnell, J. D. C., & Odden, J.  
664 (2022). Smartphone app reveals that lynx avoid human recreationists on local scale, but  
665 not home range scale. *Scientific Reports*, 12(1), 1–13.

666 van Beest, F. M., & Milner, J. M. (2013). Behavioural responses to thermal conditions affect  
667 seasonal mass change in a heat-sensitive northern ungulate. *PloS One*, 8(6), e65972.

668 Watanuki, Y., & Nakayama, Y. (1993). Age difference in activity pattern of Japanese  
669 monkeys: effects of temperature, snow, and diet. *Primates*, 34(4), 419–430.

670 Wheaton, B. (2010). Introducing the consumption and representation of lifestyle sports. *Sport*  
671 *in Society*, 13(7–8), 1057–1081.

672 Wood, S. N. (2011). Fast stable restricted maximum likelihood and marginal likelihood  
673 estimation of semiparametric generalized linear models. *Journal of the Royal Statistical*  
674 *Society (B)*, 73(1), 3–36.

675 Wood, S. N. (2017). *Generalized Additive Models: An Introduction with R* (2nd ed.).  
676 Chapman and Hall/CRC.

677 Wood, S. N., Goude, Y., & Shaw, S. (2015). Generalized additive models for large data sets.  
678 *Journal of the Royal Statistical Society: Series C (Applied Statistics)*, 64(1), 139–155.

679 Worton, B. J. (1989). Kernel methods for estimating the utilization distribution in home-  
680 range studies. *Ecology*, 70(1), 164–168.

681 Xu, W., Gong, Y., & Wang, H. (2021). Alert time reflects the negative impacts of human  
682 disturbance on an endangered bird species in Changbai Mountain, China. *Global*  
683 *Ecology and Conservation*, 28, e01709.

## Tables and Figures

**Table 1:** Total, diurnal and nocturnal Area Under Curve (unitless) estimated from predicted circadian activity patterns (median value of the bootstraps distribution,  $n = 1001$ ) of northern chamois of the National Game and Hunting Reserve of Les Bauges massif, in summer (June to September, 2004-2020), according to temperature and human disturbance. We defined “diurnal” as the period elapsed between two hours after dawn and two hours before dusk, and “nocturnal” as the period elapsed between two hours after dusk and two hours before dawn (see text for details). Values between brackets correspond to 2.5% and 97.5% quantiles (95% confidence intervals) estimated with bootstraps.

| Disturbance-Temperature variable levels |                    |             | Total activity       | Diurnal activity  | Nocturnal activity |
|-----------------------------------------|--------------------|-------------|----------------------|-------------------|--------------------|
| Potential exposure                      | Hikers disturbance | Temperature |                      |                   |                    |
| Low                                     | Low                | Low         | 10.89 [10.72; 11.06] | 5.89 [5.77; 6.01] | 1.09 [1.08; 1.09]  |
| Low                                     | High               | Low         | 11.03 [10.86; 11.19] | 5.98 [5.87; 6.11] | 1.10 [1.08; 1.10]  |
| Low                                     | Low                | High        | 11.41 [11.23; 11.54] | 5.39 [5.28; 5.51] | 1.34 [1.31; 1.34]  |
| Low                                     | High               | High        | 11.53 [11.35; 11.66] | 5.46 [5.36; 5.59] | 1.31 [1.28; 1.31]  |
| High                                    | Low                | Low         | 11.07 [10.90; 11.24] | 6.03 [5.91; 6.15] | 1.11 [1.09; 1.11]  |
| High                                    | High               | Low         | 11.03 [10.86; 11.20] | 5.99 [5.87; 6.12] | 1.12 [1.10; 1.12]  |
| High                                    | Low                | High        | 11.50 [11.32; 11.63] | 5.33 [5.22; 5.45] | 1.34 [1.31; 1.34]  |
| High                                    | High               | High        | 11.58 [11.40; 11.72] | 5.30 [5.19; 5.42] | 1.38 [1.35; 1.38]  |

**Table 2:** Timing of the morning and evening peaks (UTC) estimated from predicted circadian activity patterns (median value of the bootstraps distribution,  $n = 1001$ ) of northern chamois of the National Game and Hunting Reserve of Les Bauges massif, in summer (June to September, 2004-2020), according to temperature and human disturbance. Values between brackets correspond to 2.5% and 97.5% quantiles (95% confidence intervals) estimated with bootstraps.

| Disturbance-Temperature variable levels |                    |             | Morning peak timing  | Evening peak timing  |
|-----------------------------------------|--------------------|-------------|----------------------|----------------------|
| Potential exposure                      | Hikers disturbance | Temperature |                      |                      |
| Low                                     | Low                | Low         | 05:40 [05:10; 05:45] | 19:10 [19:10; 19:15] |
| Low                                     | High               | Low         | 05:50 [05:25; 05:55] | 19:05 [19:05; 19:10] |
| Low                                     | Low                | High        | 04:50 [04:40; 05:05] | 19:10 [19:10; 19:15] |
| Low                                     | High               | High        | 04:55 [04:45; 05:05] | 19:15 [19:15; 19:20] |
| High                                    | Low                | Low         | 05:40 [05:15; 05:40] | 19:10 [19:05; 19:10] |
| High                                    | High               | Low         | 05:55 [05:30; 05:55] | 19:05 [19:05; 19:10] |
| High                                    | Low                | High        | 04:45 [04:40; 05:10] | 19:15 [19:15; 19:15] |
| High                                    | High               | High        | 04:55 [04:45; 05:10] | 19:20 [19:20; 19:20] |

**Figure 1:** predicted circadian activity patterns (activity ranges between 0 for no activity, to 1 for the highest level of activity) of female northern chamois in the National Game and Hunting Reserve of Les Bauges massif, in summer (15<sup>th</sup> June to 7<sup>th</sup> September, 2004-2020), according to temperature (blue: cold day; red: hot day) and human disturbance: a) chamois living in a weakly exposed area during a weakly disturbed day; b) chamois living in a weakly exposed area during a highly disturbed day; c) chamois living in a highly exposed area during a weakly disturbed day; d) chamois living in a highly exposed area during a highly disturbed day. Solid lines represent predicted values from the model, shaded areas represent 95% confidence intervals. Time of the day represents hours in Coordinated Universal Time (UTC).

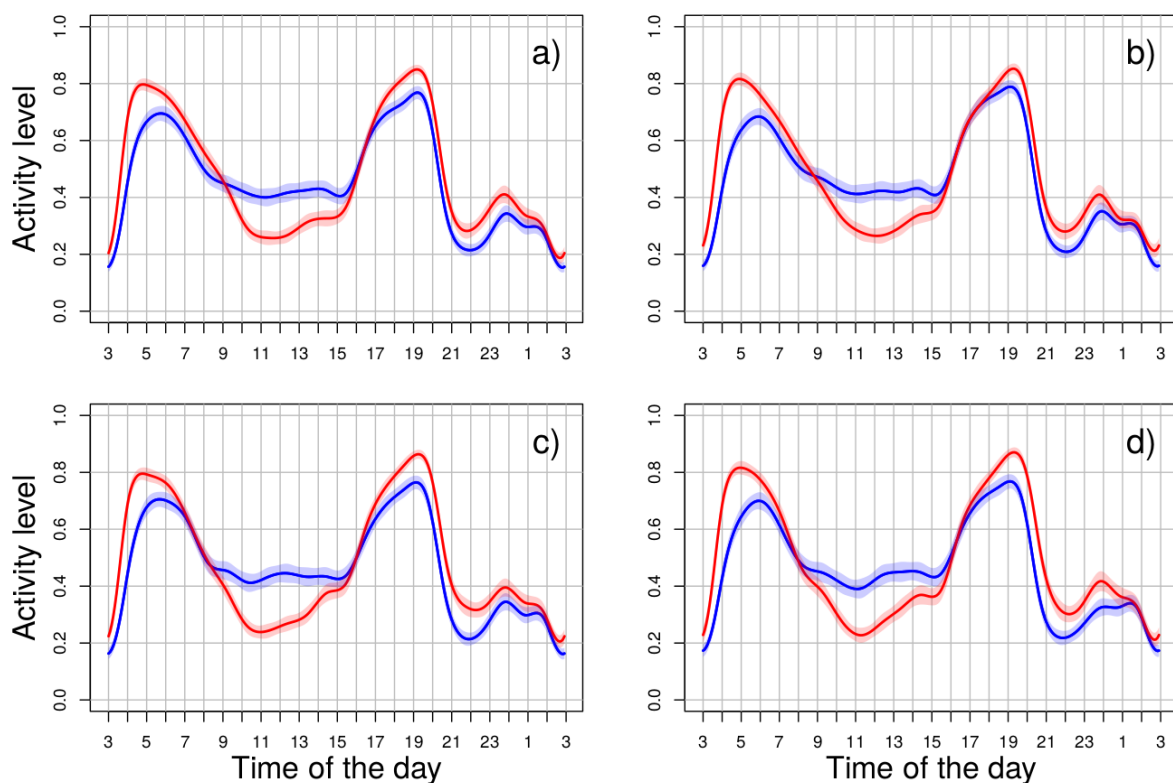



**Figure 2:** Area Under Curve (AUC) differential (unitless) between the reference situation (*i.e.* chamois living in a weakly exposed area during a cold weakly disturbed day) and the situation of interest, a combination of different levels of temperature (blue: cold day; red: hot day), spatial (dot: low exposure; triangle: high exposure) and hikers attendance (low = week days; high = week-ends): a) total, b) diurnal and c) nocturnal activity. AUC are calculated from predicted circadian activity patterns of northern chamois of the National Game and Hunting Reserve of Les Bauges massif, in summer (June to September, 2004-2020; see **Fig. 1**). The central point represents the median, and the vertical bars represent the 2.5% and 97.5% quantiles of the bootstraps distribution ( $n = 1001$ ). Note the change of scale between **Fig. 2.a** and **Fig. 2.b** and **2.c**.

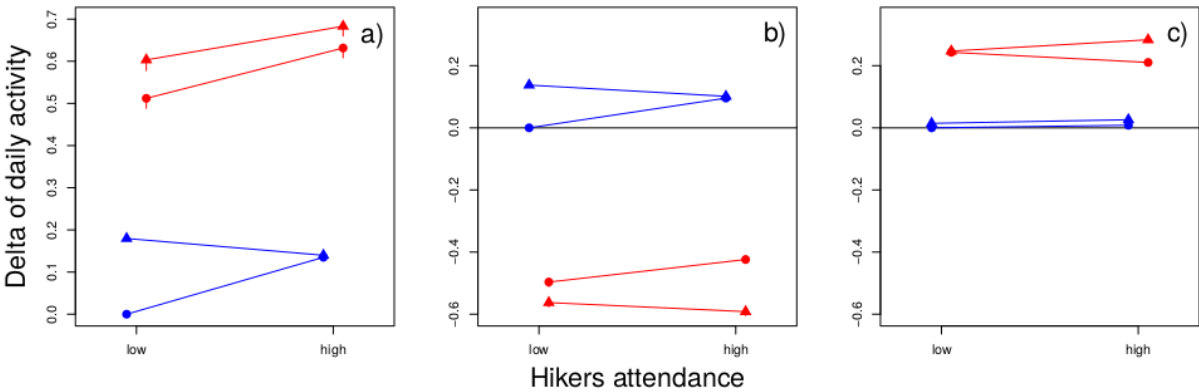

**Figure 3:** Activity Peak Timing (APT) differential (in minutes) between the reference situation (*i.e.* chamois living in a weakly exposed area during a cold weakly disturbed day) and the situation of interest, a combination of different levels of temperature (blue: cold day; red: hot day), spatial (dot: low exposure; triangle: high exposure) and temporal human disturbance: a) morning and b) evening peak. APT are calculated from predicted circadian activity patterns of northern chamois of National Game and Hunting Reserve of Les Bauges massif, in summer (June to September, 2004-2020). The central point represents the median, and the vertical bars represent the 2.5% and 97.5% quantiles of the bootstraps distribution ( $n = 1001$ ). The points have been shifted on both sides to improve readability.

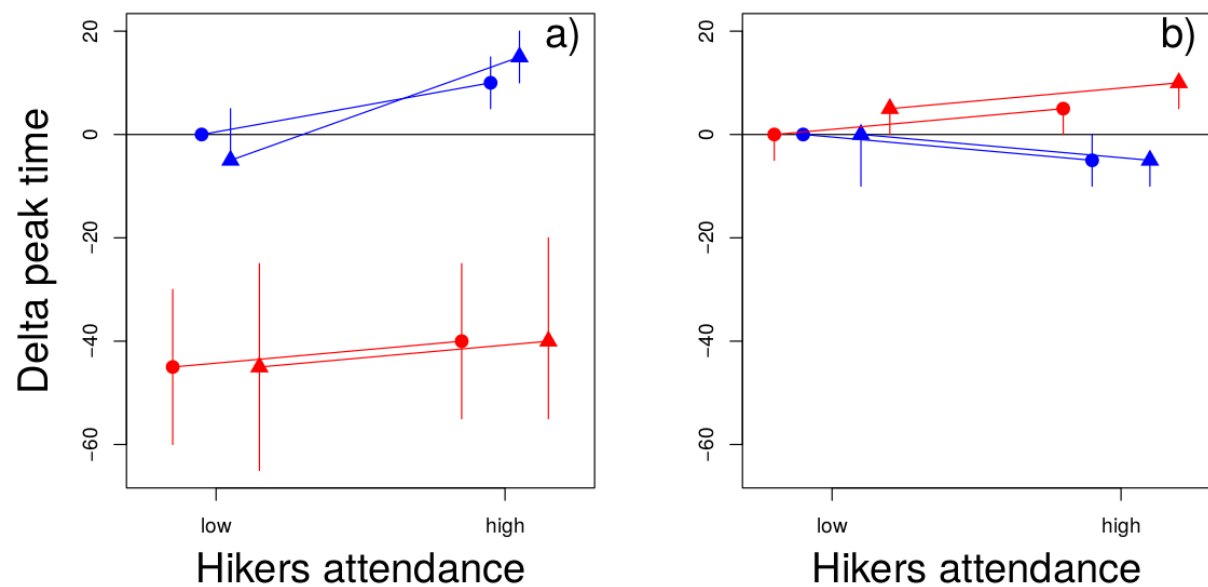

Source: https://www.biorxiv.org/content/biorxiv/early/2023/02/04/2023.02.03.527075.full.pdf
